# Supplementary material for: The Peripheral Immune Traits Changed in Patients with Multiple System Atrophy
Source: MDPI journal article supplement (doi:10.3390/brainsci13020205), 2023-01-26
Supplement: s1 [file s1]

**Supplementary Table S1.** Spearman correlations of clinical characteristics with lymphocyte subsets of MSA patients.

| Indices                                                                                                           | Age at onset |              | Disease duration |       |
|-------------------------------------------------------------------------------------------------------------------|--------------|--------------|------------------|-------|
|                                                                                                                   | R            | P            | R                | P     |
| <b>Lymphocyte Subsets</b>                                                                                         |              |              |                  |       |
| Total T cells (CD3 <sup>+</sup> CD19 <sup>-</sup> ) (%)                                                           | -0.375       | 0.074        | 0.070            | 0.736 |
| Total T cell count (CD3 <sup>+</sup> CD19 <sup>-</sup> ) (/μL)                                                    | -0.108       | 0.600        | -0.030           | 0.885 |
| Total B cells (CD3 <sup>-</sup> CD19 <sup>+</sup> ) (%)                                                           | -0.277       | 0.170        | 0.054            | 0.794 |
| Total B cell count (CD3 <sup>-</sup> CD19 <sup>+</sup> ) (/μL)                                                    | -0.201       | 0.325        | -0.001           | 0.997 |
| T/B (×10 <sup>9</sup> /L)                                                                                         | 0.144        | 0.484        | -0.025           | 0.904 |
| NK cells (CD3 <sup>-</sup> CD16 <sup>+</sup> CD56 <sup>+</sup> ) (%)                                              | 0.463        | <b>0.017</b> | -0.126           | 0.539 |
| NK cell count (CD3 <sup>-</sup> CD16 <sup>+</sup> CD56 <sup>+</sup> ) (/μL)                                       | 0.427        | <b>0.030</b> | -0.111           | 0.588 |
| T+B+NK (%)                                                                                                        | -0.361       | 0.070        | 0.093            | 0.653 |
| T+B+NK cell count (/μL)                                                                                           | -0.057       | 0.784        | -0.048           | 0.817 |
| <b>T cells Subsets</b>                                                                                            |              |              |                  |       |
| Th cells (CD3 <sup>+</sup> CD4 <sup>+</sup> ) (%)                                                                 | -0.036       | 0.860        | -0.142           | 0.488 |
| Th cell count (CD3 <sup>+</sup> CD4 <sup>+</sup> ) (/μL)                                                          | -0.074       | 0.718        | -0.152           | 0.460 |
| Tc cells (CD3 <sup>+</sup> CD8 <sup>+</sup> ) (%)                                                                 | -0.248       | 0.223        | 0.282            | 0.162 |
| Tc cell count (CD3 <sup>+</sup> CD8 <sup>+</sup> ) (/μL)                                                          | -0.300       | 0.137        | 0.356            | 0.075 |
| Th/Tc                                                                                                             | 0.171        | 0.403        | -0.311           | 0.122 |
| Th (CD3 <sup>+</sup> CD4 <sup>+</sup> CD28 <sup>+</sup> )/Th (%)                                                  | -0.274       | 0.176        | -0.286           | 0.156 |
| Tc (CD3 <sup>+</sup> CD8 <sup>+</sup> CD28 <sup>+</sup> )/Tc (%)                                                  | -0.264       | 0.192        | -0.372           | 0.061 |
| Activated T cells (CD3 <sup>+</sup> HLA-DR <sup>+</sup> ) (%)                                                     | 0.116        | 0.573        | 0.343            | 0.086 |
| Activated Tc cells (CD3 <sup>+</sup> CD8 <sup>+</sup> HLA-DR <sup>+</sup> )/Tc (%)                                | 0.462        | <b>0.017</b> | 0.349            | 0.080 |
| Treg (%) (CD3 <sup>+</sup> CD4 <sup>+</sup> CD25 <sup>+</sup> CD127low <sup>+</sup> )                             | 0.119        | 0.563        | 0.093            | 0.650 |
| Natural Treg (%) (CD45RA <sup>+</sup> CD3 <sup>+</sup> CD4 <sup>+</sup> CD25 <sup>+</sup> CD127low <sup>+</sup> ) | -0.097       | 0.636        | 0.109            | 0.598 |
| Induced Treg (%) (CD45RO <sup>+</sup> CD3 <sup>+</sup> CD4 <sup>+</sup> CD25 <sup>+</sup> CD127low <sup>+</sup> ) | 0.164        | 0.422        | 0.057            | 0.784 |
| Induced Treg/Natural Treg                                                                                         | -0.259       | 0.202        | -0.046           | 0.822 |

Abbreviations: HC, healthy controls; MSA, multiple system atrophy; NK cell, natural killer cell; Tc cell, cytotoxic T cell; Th cell, helper T cell; Treg, regulatory T cell.
