# Supplementary material for: The Peripheral Immune Traits Changed in Patients with Multiple System Atrophy
Source: MDPI journal article supplement (doi:10.3390/brainsci13020205), 2023-01-26
Supplement: s1 [file s1]

**Supplementary Table S2.** Comparison of lymphocyte subsets data in MSA patients of different genders.

| Indices                                                                                                              | Participants                 |                              | Effective size | P-value            |
|----------------------------------------------------------------------------------------------------------------------|------------------------------|------------------------------|----------------|--------------------|
|                                                                                                                      | Male (N = 16)                | Female (N = 10)              |                |                    |
| Lymphocyte Subsets                                                                                                   |                              |                              |                |                    |
| Total T cells (CD3 <sup>+</sup> CD19 <sup>-</sup> ) (%)                                                              | 68.35<br>(61.17,75.37)       | 74.21<br>(69.47,75.58)       | -1.423         | 0.155 <sup>b</sup> |
| Total T cell count (CD3 <sup>+</sup> CD19 <sup>-</sup> ) (/μL)                                                       | 1201.69 (332.81)             | 1158.60 (184.23)             | 0.424          | 0.675 <sup>a</sup> |
| Total B cells (CD3 <sup>-</sup> CD19 <sup>+</sup> ) (%)                                                              | 12.58 (4.76)                 | 12.90 (3.35)                 | -0.185         | 0.855 <sup>a</sup> |
| Total B cell count (CD3 <sup>-</sup> CD19 <sup>+</sup> ) (/μL)                                                       | 228.13 (116.36)              | 210.30 (75.52)               | 0.474          | 0.640 <sup>a</sup> |
| T/B (×10 <sup>9</sup> /L)                                                                                            | 6.03 (3.79,7.29)             | 5.85 (4.25,7.90)             | -0.211         | 0.833 <sup>b</sup> |
| NK cells (CD3 <sup>-</sup> CD16 <sup>+</sup> CD56 <sup>+</sup> ) (%)                                                 | 18.18 (8.09)                 | 14.09 (3.20)                 | 1.809          | 0.085 <sup>a</sup> |
| NK cell count (CD3 <sup>-</sup> CD16 <sup>+</sup> CD56 <sup>+</sup> ) (/μL)                                          | 325.38 (187.74)              | 225.10 (59.71)               | 1.982          | 0.062 <sup>a</sup> |
| T+B+NK (%)                                                                                                           | 99.38<br>(98.90,99.60)       | 99.34<br>(99.08,99.58)       | -0.264         | 0.792 <sup>b</sup> |
| T+B+NK cell count (/μL)                                                                                              | 1572.50<br>(1346.75,2261.25) | 1512.50<br>(1418.25,1864.00) | -0.264         | 0.792 <sup>b</sup> |
| T cells Subsets                                                                                                      |                              |                              |                |                    |
| Th cells (CD3 <sup>+</sup> CD4 <sup>+</sup> ) (%)                                                                    | 45.85 (6.22)                 | 46.56 (5.94)                 | -0.286         | 0.777 <sup>a</sup> |
| Th cell count (CD3 <sup>+</sup> CD4 <sup>+</sup> ) (/μL)                                                             | 817.44 (271.60)              | 745.7 (148.45)               | 0.869          | 0.394 <sup>a</sup> |
| Tc cells (CD3 <sup>+</sup> CD8 <sup>+</sup> ) (%)                                                                    | 20.18 (6.72)                 | 22.11 (5.97)                 | -0.742         | 0.466 <sup>a</sup> |
| Tc cell count (CD3 <sup>+</sup> CD8 <sup>+</sup> ) (/μL)                                                             | 340.88 (110.58)              | 353.50 (99.66)               | -0.294         | 0.771 <sup>a</sup> |
| Th/Tc                                                                                                                | 2.29 (1.64,3.41)             | 2.05 (1.81,3.11)             | -0.369         | 0.712 <sup>b</sup> |
| Th (CD3 <sup>+</sup> CD4 <sup>+</sup> CD28 <sup>+</sup> )/Th (%)                                                     | 98.15<br>(95.16,99.11)       | 96.76<br>(91.10,98.15)       | -1.370         | 0.171 <sup>b</sup> |
| Tc (CD3 <sup>+</sup> CD8 <sup>+</sup> CD28 <sup>+</sup> )/Tc (%)                                                     | 62.97 (17.94)                | 63.80 (9.88)                 | -0.151         | 0.881 <sup>a</sup> |
| Activated T cells (CD3 <sup>+</sup> HLA-DR <sup>+</sup> ) (%)                                                        | 14.75 (6.31)                 | 14.31 (2.95)                 | 0.240          | 0.813 <sup>a</sup> |
| Activated Tc cells (CD3 <sup>+</sup> CD8 <sup>+</sup> HLA-DR <sup>+</sup> )/Tc (%)                                   | 36.32 (13.81)                | 37.65 (9.39)                 | -0.292         | 0.773 <sup>a</sup> |
| Treg (%) (CD3 <sup>+</sup> CD4 <sup>+</sup> CD25 <sup>+</sup> CD127low <sup>+</sup> )                                | 3.93 (1.37)                  | 3.55 (1.09)                  | 0.742          | 0.466 <sup>a</sup> |
| Natural Treg (%)<br>(CD45RA <sup>+</sup> CD3 <sup>+</sup> CD4 <sup>+</sup> CD25 <sup>+</sup> CD127low <sup>+</sup> ) | 0.99 (0.49)                  | 0.87 (0.36)                  | 0.655          | 0.519 <sup>a</sup> |
| Induced Treg (%)<br>(CD45RO <sup>+</sup> CD3 <sup>+</sup> CD4 <sup>+</sup> CD25 <sup>+</sup> CD127low <sup>+</sup> ) | 2.80 (2.03,4.01)             | 2.94 (1.76,3.51)             | -0.659         | 0.510 <sup>b</sup> |
| Induced Treg/Natural Treg                                                                                            | 0.36 (0.18)                  | 0.34 (0.16)                  | 0.232          | 0.818 <sup>a</sup> |

Data presented as mean (SD) or median (25% quantile, 75% quantile). P value calculated by Student's t-test<sup>a</sup> or Mann-Whitney U-test<sup>b</sup>. Abbreviations: MSA, multiple system atrophy; Th cell, helper T cell; Tc cell, cytotoxic T cell; NK cell, natural killer cell; Treg, regulatory T cell; SD, standard deviation.
